# Supplementary material
Source: publisher figshare collection journal article supplement (https://acs.figshare.com/ndownloader/files/4343383)

**Supporting material I (Chaudhuri *et al.*)**

**Figure S1. (a) SAXS and SANS H/D contrast variation data series ( $\log I$  versus  $q$  in  $\text{\AA}^{-1}$ ).**

Scattering profile of the tbParB-parS22 assembly is shown at 3 different concentrations. Intensity is shown in arbitrary unit.

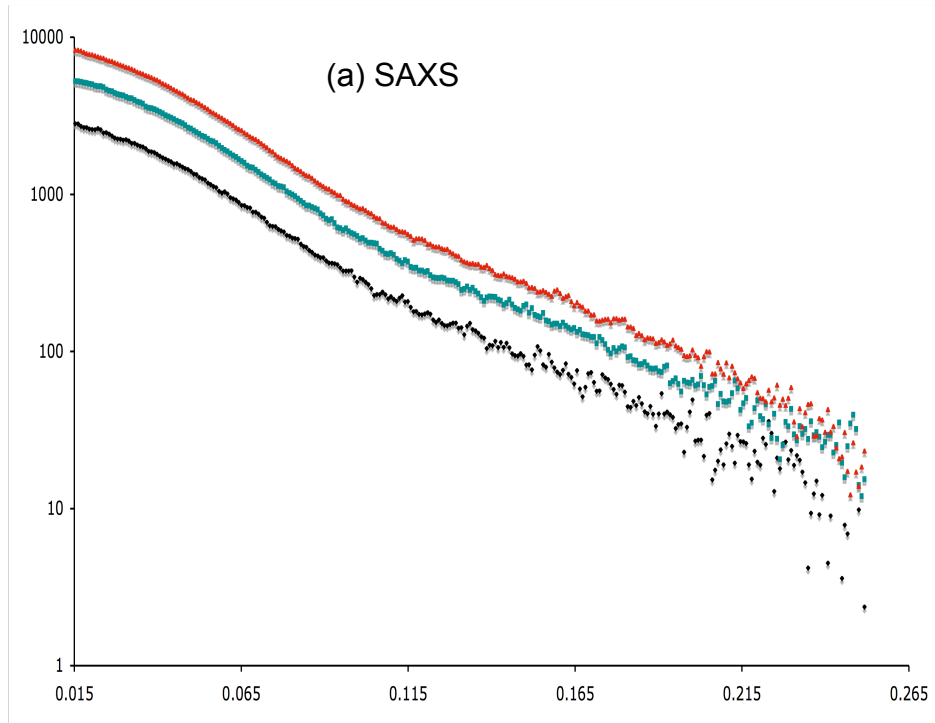

**Supporting material I (Chaudhuri *et al.*)**

Figure S1. (b) The pair distribution function  $P(r)$  plotted against the pair-wise distance ( $r$  in Å) is shown for the tbParB-*parS22* SAXS dataset (computed in GNOM (43),  $P(0) = 0$  and  $P(r \geq D_{\max}) = 0$  conditions were not imposed).

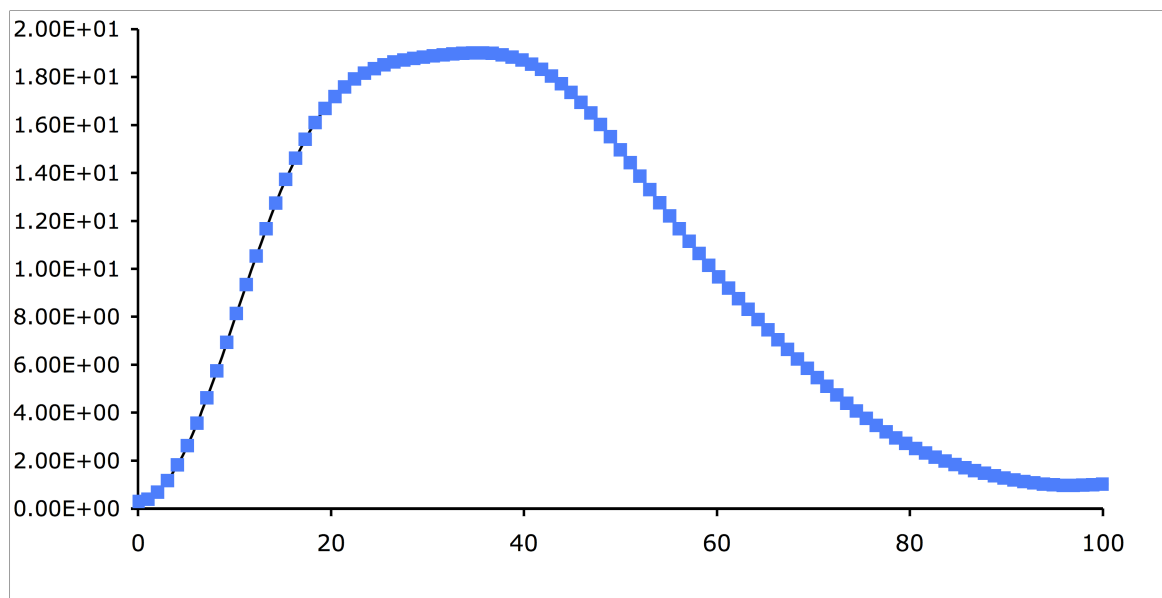

### Supporting material I (Chaudhuri *et al.*)

Figure S1. (c-h) SAXS and SANS H/D contrast variation data series ( $\log I$  versus  $q$  in  $\text{\AA}^{-1}$ ).

Fitting of the scattering profiles (black line) computed from the shape of the tbParB-parS22 to the solution scattering data sets are shown (red dots; overall  $\chi = 1.3$ , fit and the  $\chi$ -values are reported by MONSA). The dataset with 34.5 %  $\text{D}_2\text{O}$  was not included in the shape reconstruction.

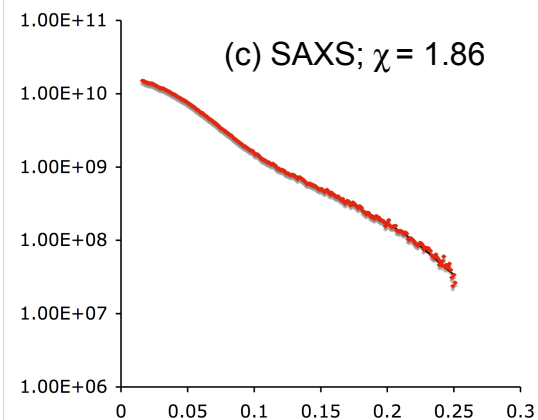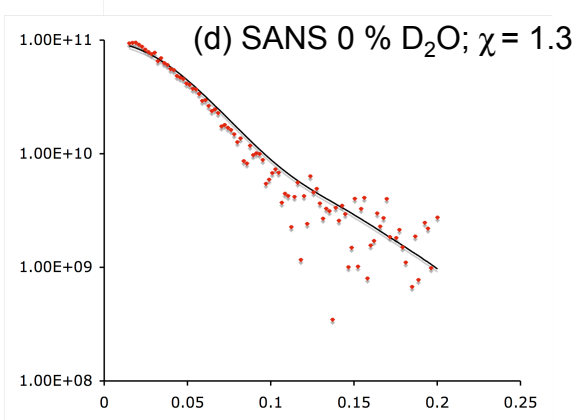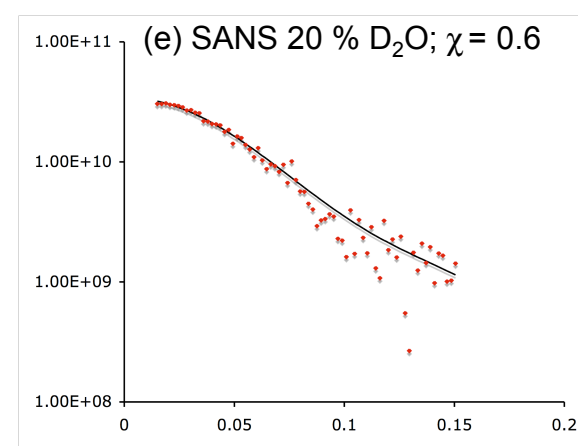

(f) SANS 78.5 %  $\text{D}_2\text{O}$ ;  $\chi = 1.6$

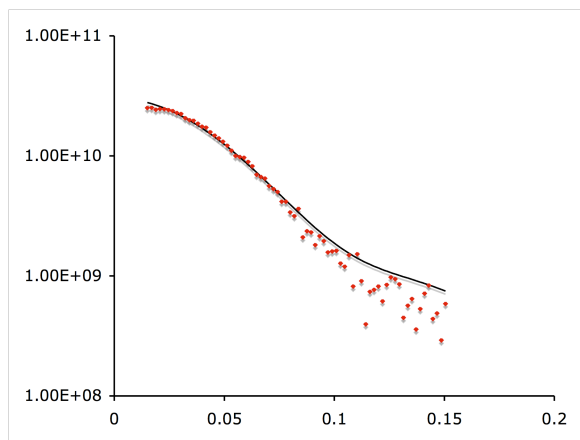

(g) SANS 86 %  $\text{D}_2\text{O}$ ;  $\chi = 1.6$

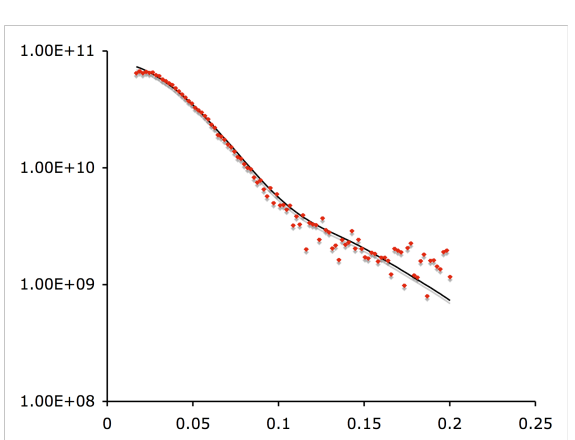

(h) SANS 34.5 %  $\text{D}_2\text{O}$ ;

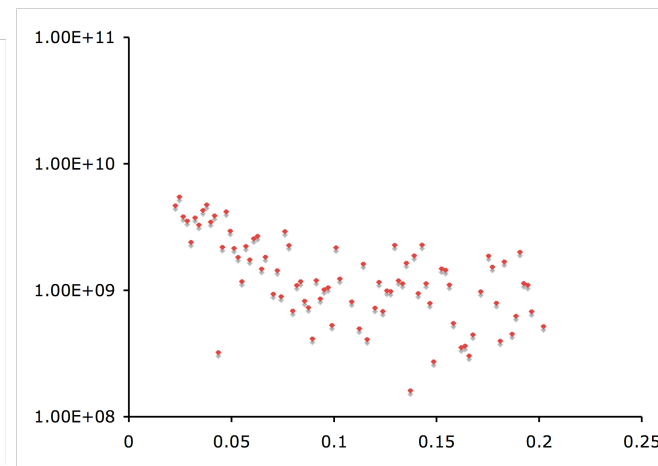

**Supporting material I (Chaudhuri *et al.*)**

Figure S1. (i-l) Two examples of individual MONSA shape reconstructions in two orientations are shown (protein: grey beads, DNA: red beads).

(i) Model 1

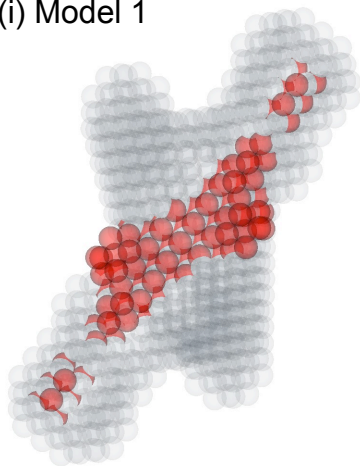

(j) Model 1

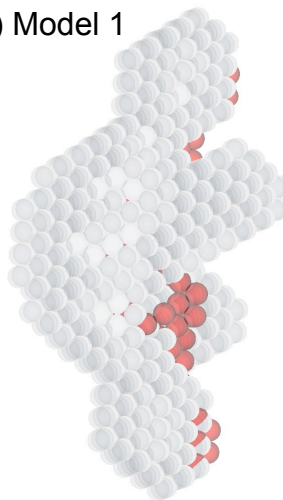

(k) Model 2

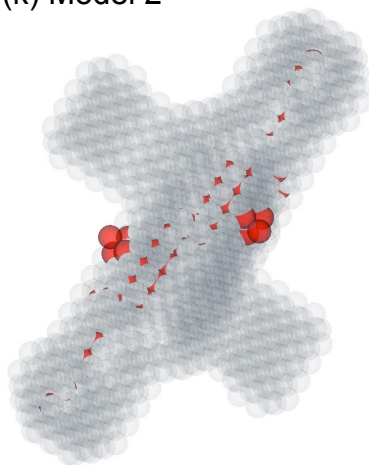

(l) Model 2

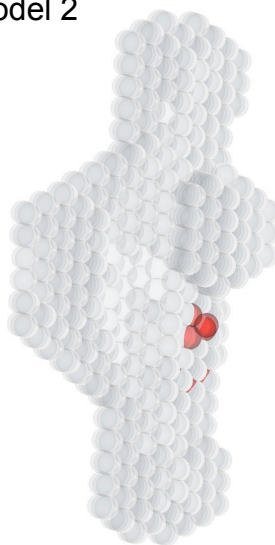

Supplement: Supplementary file 1 [file 4343383]
